# Supplementary material for: Spoink, a LTR retrotransposon, invaded D. melanogaster populations in the 1990s
Source: PLoS Genet. 2024 Mar 26;20(3):e1011201. doi: 10.1371/journal.pgen.1011201 (PMC10965091; doi:10.1371/journal.pgen.1011201)
Supplement: S5 Table — Data are from [31, 40, 51–53]). (XLSX) [file pgen.1011201.s015.xlsx]

## Sheet: Sheet 1
accession	strain	year	location
SRR23876563	museum	1800	Lund, Sweden
SRR23876564	museum	1800	Lund, Sweden
SRR23876562	museum	1850	Passau, Germany
SRR23876569	museum	1850	Passau, Germany
SRR23876586	museum	1933	Lund, Sweden
SRR11846555	Crimea	1936	Crimea, Ukraine
SRR11846565	Hikone-R	1958	Japan
SRR457698	A2(BOG1)	1962	Bogota, Colombia
SRR457707	A4(KSA2)	1963	South Africa
SRR457701	B4(RVC3)	1963	California, USA
SRR457669	A5(VAG1)	1965	Athens, Greece
SRR457697	A6(wild5B)	1966	Georgia, USA
SRR11846560	Harwich	1967	Harwich, MA, USA
SRR11460801	Pi2	1975
SRR13257684	RI75-1	1975	Providence, USA
SRR14293191	RI75-2	1975	Providence, USA
SRR14293574	RI75-5	1975	Providence, USA
SRR14293140	RI75-10	1975	Providence, USA
SRR14293233	RI75-4	1975	Providence, USA
SRR14294393	RI75-7	1975	Providence, USA
SRR14294796	RI75-11	1975	Providence, USA
SRR14294940	RI75-13	1975	Providence, USA
SRR14293576	RI75-6	1975	Providence, USA
SRR14294899	RI75-12	1975	Providence, USA
SRR14294944	RI77-50	1977	Providence, USA
SRR14296646	RI77-52	1977	Providence, USA
SRR14296993	RI77-53	1977	Providence, USA
SRR14297433	RI77-61	1977	Providence, USA
SRR14297455	RI77-55	1977	Providence, USA
SRR14298094	RI77-60	1977	Providence, USA
SRR14296430	RI7751	1977	Providence, USA
SRR14297771	RI77-58	1977	Providence, USA
SRR14297795	RI77-56	1977	Providence, USA
SRR14298064	RI77-54	1977	Providence, USA
SRR14297441	RI78-1A	1978	Providence, USA
SRR14297770	RI78-6	1978	Providence, USA
SRR14297954	RI78-14	1978	Providence, USA
SRR14298028	RI78-1B	1978	Providence, USA
SRR14297434	RI78-12	1978	Providence, USA
SRR14297796	RI78-11	1978	Providence, USA
SRR14297813	RI78-8	1978	Providence, USA
SRR14297794	RI78-13	1978	Providence, USA
SRR14298002	RI78-5	1978	Providence, USA
SRR14298055	RI78-7	1978	Providence, USA
SRR14298091	RI78-9	1978	Providence, USA
SRR14297456	RI79-7	1979	Providence, USA
SRR14298093	RI79-3	1979	Providence, USA
SRR14306823	RI79-10	1979	Providence, USA
SRR14306826	RI79-17	1979	Providence, USA
SRR14306827	RI79-16	1979	Providence, USA
SRR14306825	RI79-19	1979	Providence, USA
SRR14306829	RI79-14	1979	Providence, USA
SRR14306830	RI79-13	1979	Providence, USA
SRR14298105	RI79-1	1979	Providence, USA
SRR14306822	RI79-20	1979	Providence, USA
SRR14306824	RI79-9	1979	Providence, USA
SRR14306828	RI79-15	1979	Providence, USA
SRR14306831	RI79-12	1979	Providence, USA
SRR14306842	RI79-11	1979	Providence, USA
SRR14306841	RI80-15	1980	Providence, USA
SRR14306844	RI80-11	1980	Providence, USA
SRR14306847	RI80-7	1980	Providence, USA
SRR14306850	RI80-4	1980	Providence, USA
SRR14306821	RI80-2	1980	Providence, USA
SRR14306843	RI80-13	1980	Providence, USA
SRR14306845	RI80-9	1980	Providence, USA
SRR14306846	RI80-8	1980	Providence, USA
SRR14306848	RI80-6	1980	Providence, USA
SRR14306849	RI80-5	1980	Providence, USA
SRR14306833	RI83-8	1983	Providence, USA
SRR14306835	RI83-6	1983	Providence, USA
SRR14306837	RI83-4	1983	Providence, USA
SRR14306838	RI83-3	1983	Providence, USA
SRR14306834	RI83-7	1983	Providence, USA
SRR14306832	RI83-9	1983	Providence, USA
SRR14306836	RI83-5	1983	Providence, USA
SRR14306839	RI83-2	1983	Providence, USA
SRR14306840	RI83-1	1983	Providence, USA
SRR1663598	ZH23	1993	Zimbabwe
SRR1663599	ZH26	1993	Zimbabwe
SRR1663600	ZH33	1993	Zimbabwe
SRR1663601	ZH42	1993	Zimbabwe
SRR1663602	ZS10	1993	Zimbabwe
SRR1663603	ZW09	1993	Zimbabwe
SRR1663604	ZW139	1993	Zimbabwe
SRR1663605	ZW140	1993	Zimbabwe
SRR1663606	ZW142	1993	Zimbabwe
SRR1663607	ZW144	1993	Zimbabwe
SRR1663608	ZW155	1993	Zimbabwe
SRR1663609	ZW177	1993	Zimbabwe
SRR1663610	ZW184	1993	Zimbabwe
SRR1663611	ZW185	1993	Zimbabwe
SRR1769729	ZW155	1993	Zimbabwe
SRR1662283	B04	1995	Beijing, China
SRR1663528	B05	1995	Beijing, China
SRR1663529	B10	1995	Beijing, China
SRR1663530	B11	1995	Beijing, China
SRR1663531	B12	1995	Beijing, China
SRR1663532	B14	1995	Beijing, China
SRR1663533	B23	1995	Beijing, China
SRR1663534	B28	1995	Beijing, China
SRR1663535	B38	1995	Beijing, China
SRR1663536	B42	1995	Beijing, China
SRR1663537	B43	1995	Beijing, China
SRR1663538	B51	1995	Beijing, China
SRR1663539	B52	1995	Beijing, China
SRR1663540	B54	1995	Beijing, China
SRR1663541	B59	1995	Beijing, China
SRR1663561	N01	2003	Netherlands
SRR1663562	N02	2003	Netherlands
SRR1663563	N03	2003	Netherlands
SRR1663564	N04	2003	Netherlands
SRR1663565	N07	2003	Netherlands
SRR1663566	N10	2003	Netherlands
SRR1663567	N11	2003	Netherlands
SRR1663568	N13	2003	Netherlands
SRR1663569	N14	2003	Netherlands
SRR1663570	N15	2003	Netherlands
SRR1663571	N16	2003	Netherlands
SRR1663572	N17	2003	Netherlands
SRR1663573	N18	2003	Netherlands
SRR1663574	N19	2003	Netherlands
SRR1663575	N22	2003	Netherlands
SRR1663576	N23	2003	Netherlands
SRR1663577	N25	2003	Netherlands
SRR1663578	N29	2003	Netherlands
SRR1663579	N30	2003	Netherlands
SRR1663580	T01	2003	Tasmania, Australia
SRR1663581	T04	2003	Tasmania, Australia
SRR1663582	T05	2003	Tasmania, Australia
SRR1663583	T07	2003	Tasmania, Australia
SRR1663584	T09	2003	Tasmania, Australia
SRR1663585	T10 female	2003	Tasmania, Australia
SRR1663586	T14A	2003	Tasmania, Australia
SRR1663587	T22A	2003	Tasmania, Australia
SRR1663588	T23	2003	Tasmania, Australia
SRR1663589	T24	2003	Tasmania, Australia
SRR1663590	T25A	2003	Tasmania, Australia
SRR1663591	T29A	2003	Tasmania, Australia
SRR1663592	T30	2003	Tasmania, Australia
SRR1663593	T35	2003	Tasmania, Australia
SRR1663594	T36B	2003	Tasmania, Australia
SRR1663595	T39	2003	Tasmania, Australia
SRR1663596	T43A	2003	Tasmania, Australia
SRR1663597	T45B	2003	Tasmania, Australia
SRR1663542	I01	2004	Ithaca, USA
SRR1663543	I02	2004	Ithaca, USA
SRR1663544	I03	2004	Ithaca, USA
SRR1663545	I04	2004	Ithaca, USA
SRR1663546	I06	2004	Ithaca, USA
SRR1663547	I07	2004	Ithaca, USA
SRR1663548	I13	2004	Ithaca, USA
SRR1663549	I16	2004	Ithaca, USA
SRR1663550	I17	2004	Ithaca, USA
SRR1663551	I22	2004	Ithaca, USA
SRR1663552	I23	2004	Ithaca, USA
SRR1663553	I24	2004	Ithaca, USA
SRR1663554	I26	2004	Ithaca, USA
SRR1663555	I29	2004	Ithaca, USA
SRR1663556	I31	2004	Ithaca, USA
SRR1663557	I33	2004	Ithaca, USA
SRR1663558	I34	2004	Ithaca, USA
SRR1663559	I35	2004	Ithaca, USA
SRR1663560	I38	2004	Ithaca, USA
SRR14308759	spring4	2014	Providence, USA
SRR14308763	fall6	2014	Providence, USA
SRR14308767	spring12	2014	Providence, USA
SRR14308768	spring11	2014	Providence, USA
SRR14308772	spring7	2014	Providence, USA
SRR14308776	fall1	2014	Providence, USA
SRR14308762	spring1	2014	Providence, USA
SRR14308764	fall5	2014	Providence, USA
SRR14308766	fall3	2014	Providence, USA
SRR14308774	spring5	2014	Providence, USA
SRR14308775	fall2	2014	Providence, USA
SRR14308760	spring3	2014	Providence, USA
SRR14308761	spring2	2014	Providence, USA
SRR14308765	fall4	2014	Providence, USA
SRR14308769	spring10	2014	Providence, USA
SRR14308770	spring9	2014	Providence, USA
SRR14308771	spring8	2014	Providence, USA
SRR14308773	spring6	2014	Providence, USA
SRR9951090	ES_Ten_15_15	2015	Tenerife, Spain
